# Supplementary material for: Efficacy of chitosan-based nanoparticle vaccine administered to broiler birds challenged with Salmonella
Source: PubMed Central journal article supplement (PMC7182187; doi:10.1371/journal.pone.0231998), 2020-04-24
Supplement: pone.0231998.s001.pdf [file pone.0231998.s001.pdf]

| <b>A. Experiment 1 - Final (d25) BWG &amp; FCR</b> |                |            |            |            |
|----------------------------------------------------|----------------|------------|------------|------------|
| <b>Parameter</b>                                   | <b>BWG (g)</b> | <b>SEM</b> | <b>FCR</b> | <b>SEM</b> |
| <b>Control (PBS)</b>                               | 155.46         | 45.35      | 1.82       | 0.21       |
| <b>500µg</b>                                       | 137.37         | 45.35      | 1.30       | 0.10       |
| <b>1000µg</b>                                      | 150.12         | 26.98      | 1.37       | 0.15       |
| <b>2000µg</b>                                      | 153.09         | 26.52      | 1.30       | 0.21       |
| <b>P-value</b>                                     | <i>P</i> >0.05 |            |            |            |
| <b>B. Experiment 2 - Final (d18) BWG &amp; FCR</b> |                |            |            |            |
| <b>S. Heidelberg challenge</b>                     | <b>BWG (g)</b> | <b>SEM</b> | <b>FCR</b> | <b>SEM</b> |
| <b>Control (no vaccine)</b>                        | 415.46         | 47.35      | 1.20       | 0.14       |
| <b>CNP vaccine</b>                                 | 450.37         | 45.02      | 1.30       | 0.15       |
| <b>Commercial vaccine</b>                          | 455.12         | 26.98      | 1.37       | 0.11       |
| <b>P-value</b>                                     | <i>P</i> >0.05 |            |            |            |
| <b>S. Enteritidis challenge</b>                    | <b>BWG (g)</b> | <b>SEM</b> | <b>FCR</b> | <b>SEM</b> |
| <b>Control (no vaccine)</b>                        | 423.46         | 45.35      | 1.25       | 0.14       |
| <b>CNP vaccine</b>                                 | 415.37         | 43.05      | 1.14       | 0.15       |
| <b>Commercial vaccine</b>                          | 420.12         | 26.98      | 1.16       | 0.11       |
| <b>P-value</b>                                     | <i>P</i> >0.05 |            |            |            |
